# Supplementary material for: Structure and Age Jointly Influence Rates of Protein Evolution
Source: PLOS journal article supplement (doi:10.1371/journal.pcbi.1002542), 2012-05-31
Supplement: S6 (10.1371/journal.pcbi.1002542.s006) [file journal.pcbi.1002542.s006]

| Protein | Native Rank | Native Z-score | Native Rank (Feng) | Native Rank (Krishnamoorthy) |
|---------|-------------|----------------|--------------------|------------------------------|
| 1beo    | 1 (1998)    | -6.6           | 1                  | 1                            |
| 1ctf    | 1 (654)     | -5.5           | 1                  | 1                            |
| 1dkt-A  | 1 (693)     | -4.5           | 19                 | 89                           |
| 1fca    | 1 (2001)    | -6.6           | 301                | 1                            |
| 1nkl    | 1 (1995)    | -7.7           | 1                  | 1                            |
| 1pgb    | 1 (1995)    | -5.7           | 39                 | 14                           |
| 1trl-A  | 142 (1995)  | -1.5           | 1                  | 1179                         |
| 4icb    | 1 (1998)    | -5.5           | 10                 | 5                            |

**Table S1. Structure Recognition: Discrimination of Native from Decoy Structures.**

Comparison of the performance of our potential (Native rank) with the performance of the potential derived by Feng (Feng, Kloczkowski, & Jernigan, 2007) and Krishnamoorthy (Krishnamoorthy & Tropsha, 2003).
